# Supplementary material
Source: Research Square preprint supplement (doi:10.21203/rs.3.rs-8952056/v1)
Supplement: Supplementary file 1 [file 6915a3db5af71e56e9e00814.docx]

**Compliance of oral nutrition supplementation in elderly patients with hip fracture during perioperative period：a qualitative study**

Supplementary materials:interview outline

1 .What is your current situation of oral nutrition supplementation ?

2.How do you think about the role of oral nutrition supplementation in the rehabilitation process ?

3.What are the obstacles or difficulties in the process of taking ?

4 .What are the reasons why you choose to take (or do not take) oral nutritional supplements ?

5.Did family members or nursing staff give help or reminder during the course of taking ? What are the effects on you ?

6. What is your experience when taking oral nutritional supplements ? In what aspects do you hope to improve ?

7. If the conditions improve, are you willing to insist on taking nutritional supplements ? Why ?
